# Supplementary material
Source: MDPI journal article supplement (https://www.mdpi.com/2073-4441/14/16/2532)
Supplement: s1 [file s1]

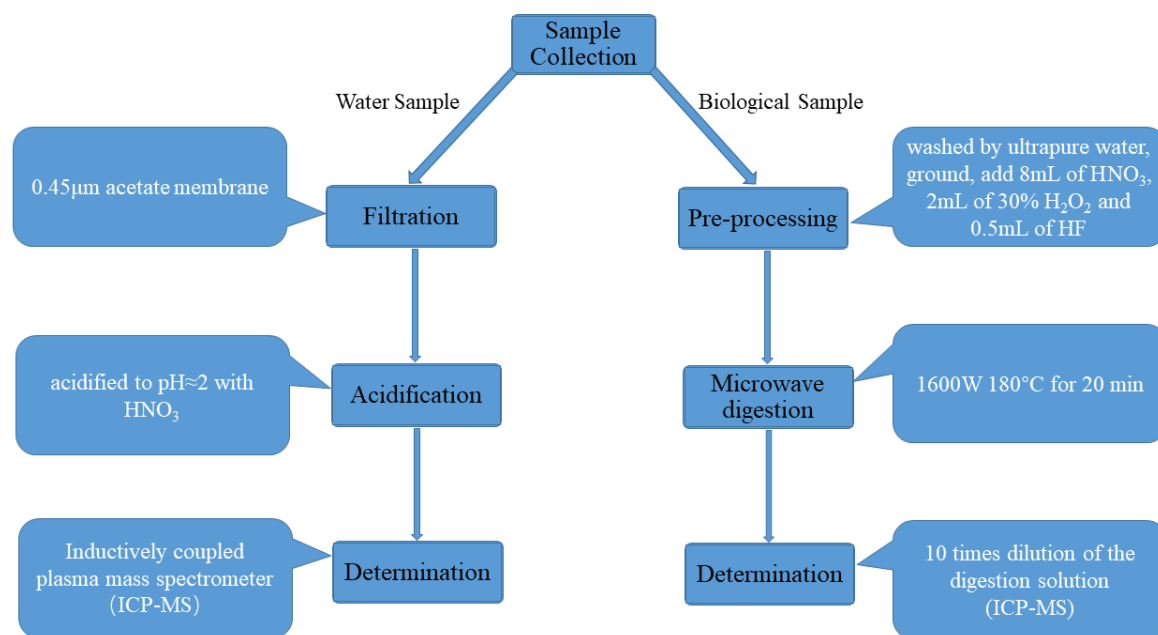

**Figure S1.** Schematic diagram of the sample handling process

**Table S1.** Bio-concentration factors (BCF) of oysters and barnacles to heavy metals in coastal waters of Zhanjiang Bay.

| Fouling organism | layers        | Stations | Cu                  | Zn                  | As                  | Cd                   | Pb                  | Cr                  |
|------------------|---------------|----------|---------------------|---------------------|---------------------|----------------------|---------------------|---------------------|
| Oyster           | Surface layer | A1       | 1.2×10 <sup>4</sup> | 3.0×10 <sup>4</sup> | 3.4×10 <sup>2</sup> | 5.3×10 <sup>3</sup>  | 5.1×10 <sup>2</sup> | 2.3×10 <sup>3</sup> |
|                  |               | A2       | 5.7×10 <sup>3</sup> | 2.4×10 <sup>4</sup> | 2.3×10 <sup>2</sup> | 4.1×10 <sup>3</sup>  | 1.5×10 <sup>2</sup> | 6.1×10 <sup>2</sup> |
|                  |               | A3       | 7.6×10 <sup>3</sup> | 3.3×10 <sup>4</sup> | 2.4×10 <sup>2</sup> | 5.0×10 <sup>3</sup>  | 4.2×10 <sup>2</sup> | 1.7×10 <sup>3</sup> |
|                  |               | A4       | 8.2×10 <sup>3</sup> | 2.8×10 <sup>4</sup> | 2.1×10 <sup>2</sup> | 3.7×10 <sup>3</sup>  | 2.8×10 <sup>2</sup> | 8.9×10 <sup>2</sup> |
|                  |               | A5       | 1.1×10 <sup>4</sup> | 2.7×10 <sup>4</sup> | 2.4×10 <sup>2</sup> | 3.6×10 <sup>3</sup>  | 2.9×10 <sup>2</sup> | 1.2×10 <sup>3</sup> |
|                  |               | A6       | 7.9×10 <sup>3</sup> | 4.2×10 <sup>4</sup> | 2.1×10 <sup>2</sup> | 3.9×10 <sup>3</sup>  | 2.7×10 <sup>2</sup> | 1.1×10 <sup>3</sup> |
|                  |               | A0       | 7.2×10 <sup>3</sup> | 2.8×10 <sup>4</sup> | 2.3×10 <sup>2</sup> | 2.7×10 <sup>3</sup>  | 2.0×10 <sup>2</sup> | 1.0×10 <sup>3</sup> |
|                  | Middle layer  | A1       | 1.4×10 <sup>4</sup> | 2.7×10 <sup>4</sup> | 2.7×10 <sup>2</sup> | 4.4×10 <sup>3</sup>  | 2.4×10 <sup>2</sup> | 2.3×10 <sup>3</sup> |
|                  |               | A2       | 9.4×10 <sup>3</sup> | 3.1×10 <sup>4</sup> | 1.7×10 <sup>2</sup> | 4.0×10 <sup>3</sup>  | 1.6×10 <sup>2</sup> | 1.1×10 <sup>3</sup> |
|                  |               | A3       | 9.3×10 <sup>3</sup> | 2.8×10 <sup>4</sup> | 2.9×10 <sup>2</sup> | 3.6×10 <sup>3</sup>  | 1.7×10 <sup>2</sup> | 1.6×10 <sup>3</sup> |
|                  |               | A4       | 1.0×10 <sup>4</sup> | 3.0×10 <sup>4</sup> | 2.6×10 <sup>2</sup> | 3.6×10 <sup>3</sup>  | 3.1×10 <sup>2</sup> | 9.0×10 <sup>2</sup> |
|                  |               | A5       | 9.2×10 <sup>3</sup> | 2.6×10 <sup>4</sup> | 2.4×10 <sup>2</sup> | 2.8×10 <sup>3</sup>  | 2.1×10 <sup>2</sup> | 1.4×10 <sup>3</sup> |
|                  |               | A6       | 4.9×10 <sup>3</sup> | 3.6×10 <sup>4</sup> | 1.9×10 <sup>2</sup> | 2.8×10 <sup>3</sup>  | 3.1×10 <sup>2</sup> | 7.7×10 <sup>2</sup> |
|                  |               | A0       | 6.9×10 <sup>3</sup> | 3.1×10 <sup>4</sup> | 2.5×10 <sup>2</sup> | 3.6×10 <sup>3</sup>  | 3.4×10 <sup>2</sup> | 6.3×10 <sup>3</sup> |
| Barnacle         | Surface layer | A1       | 4.8×10 <sup>3</sup> | 1.8×10 <sup>4</sup> | 3.7×10 <sup>2</sup> | 2.2×10 <sup>4</sup>  | 3.1×10 <sup>2</sup> | 1.2×10 <sup>4</sup> |
|                  |               | A2       | 4.0×10 <sup>3</sup> | 1.8×10 <sup>4</sup> | 3.0×10 <sup>2</sup> | 1.8×10 <sup>4</sup>  | 1.4×10 <sup>2</sup> | 7.2×10 <sup>3</sup> |
|                  |               | A3       | 2.5×10 <sup>3</sup> | 9.4×10 <sup>3</sup> | 2.3×10 <sup>2</sup> | 2.7×10 <sup>4</sup>  | 1.0×10 <sup>2</sup> | 1.2×10 <sup>4</sup> |
|                  |               | A4       | 8.8×10 <sup>2</sup> | 6.5×10 <sup>3</sup> | 1.5×10 <sup>2</sup> | 7.8×10 <sup>3</sup>  | 1.4×10 <sup>2</sup> | 4.2×10 <sup>3</sup> |
|                  |               | A5       | 1.8×10 <sup>3</sup> | 1.5×10 <sup>4</sup> | 4.2×10 <sup>2</sup> | 1.3×10 <sup>4</sup>  | 1.1×10 <sup>2</sup> | 5.4×10 <sup>3</sup> |
|                  |               | A6       | 1.8×10 <sup>3</sup> | 1.5×10 <sup>4</sup> | 3.4×10 <sup>2</sup> | 7.7×10 <sup>3</sup>  | 2.4×10 <sup>2</sup> | 6.7×10 <sup>3</sup> |
|                  |               | A0       | 1.0×10 <sup>3</sup> | 1.7×10 <sup>4</sup> | 2.3×10 <sup>2</sup> | 5.2×10 <sup>3</sup>  | 2.1×10 <sup>2</sup> | 1.1×10 <sup>3</sup> |
|                  | Middle layer  | A1       | 2.6×10 <sup>3</sup> | 1.6×10 <sup>4</sup> | 1.9×10 <sup>2</sup> | 1.0×10 <sup>4</sup>  | 3.9×10 <sup>2</sup> | 3.7×10 <sup>3</sup> |
|                  |               | A2       | 5.1×10 <sup>3</sup> | 2.1×10 <sup>4</sup> | 2.6×10 <sup>2</sup> | 14.1×10 <sup>3</sup> | 3.8×10 <sup>2</sup> | 5.2×10 <sup>3</sup> |
|                  |               | A3       | 2.6×10 <sup>3</sup> | 1.8×10 <sup>4</sup> | 3.7×10 <sup>2</sup> | 15.7×10 <sup>3</sup> | 4.0×10 <sup>2</sup> | 3.9×10 <sup>3</sup> |
|                  |               | A4       | 3.1×10 <sup>3</sup> | 2.5×10 <sup>4</sup> | 5.0×10 <sup>2</sup> | 2.0×10 <sup>4</sup>  | 3.4×10 <sup>2</sup> | 7.2×10 <sup>3</sup> |
|                  |               | A5       | 1.1×10 <sup>3</sup> | 1.1×10 <sup>4</sup> | 2.4×10 <sup>2</sup> | 1.5×10 <sup>4</sup>  | 86.7                | 5.3×10 <sup>3</sup> |
|                  |               | A6       | 1.1×10 <sup>3</sup> | 1.9×10 <sup>4</sup> | 2.7×10 <sup>2</sup> | 5.2×10 <sup>3</sup>  | 2.1×10 <sup>2</sup> | 2.5×10 <sup>3</sup> |
|                  |               | A0       | 3.1×10 <sup>3</sup> | 1.7×10 <sup>4</sup> | 2.1×10 <sup>2</sup> | 5.3×10 <sup>3</sup>  | 1.7×10 <sup>2</sup> | 2.1×10 <sup>3</sup> |

**Table S2.** biota sediment accumulation factors (BSAF) of oysters and barnacles to heavy metals in coastal waters of Zhanjiang Bay (%).

| Fouling organism | layers        | Stations | Cu    | Zn    | Cd     | Pb   | Cr    |
|------------------|---------------|----------|-------|-------|--------|------|-------|
| Oyster           | Surface layer | A1       | 194.1 | 248.6 | 456.1  | 1.16 | 2.37  |
|                  |               | A2       | 89.8  | 202.9 | 358.3  | 0.35 | 0.63  |
|                  |               | A3       | 120.0 | 280.0 | 434.0  | 0.96 | 1.72  |
|                  |               | A4       | 129.5 | 236.2 | 318.2  | 0.63 | 0.92  |
|                  |               | A5       | 170.8 | 228.7 | 314.4  | 0.66 | 1.25  |
|                  |               | A6       | 124.3 | 357.0 | 341.8  | 0.62 | 1.16  |
|                  |               | A0       | 113.7 | 237.8 | 231.0  | 0.45 | 1.04  |
|                  | Middle layer  | A1       | 213.0 | 228.9 | 378.6  | 0.54 | 2.33  |
|                  |               | A2       | 147.4 | 259.4 | 348.2  | 0.37 | 1.12  |
|                  |               | A3       | 147.2 | 235.6 | 313.4  | 0.38 | 1.69  |
|                  |               | A4       | 161.5 | 254.7 | 314.5  | 0.71 | 0.94  |
|                  |               | A5       | 145.4 | 220.4 | 239.8  | 0.47 | 1.46  |
|                  |               | A6       | 77.1  | 305.6 | 242.8  | 0.71 | 0.80  |
|                  |               | A0       | 109.3 | 257.5 | 312.4  | 0.77 | 0.65  |
| Barnacle         | Surface layer | A1       | 75.6  | 154.9 | 1921.9 | 0.70 | 12.55 |
|                  |               | A2       | 63.2  | 150.6 | 1590.3 | 0.31 | 7.45  |
|                  |               | A3       | 39.5  | 78.9  | 2337.4 | 0.23 | 11.92 |
|                  |               | A4       | 13.8  | 54.4  | 674.0  | 0.32 | 4.34  |
|                  |               | A5       | 28.6  | 122.8 | 1169.0 | 0.25 | 5.62  |
|                  |               | A6       | 28.9  | 123.6 | 663.0  | 0.55 | 6.91  |
|                  |               | A0       | 15.7  | 145.9 | 449.5  | 0.48 | 1.10  |
|                  | Middle layer  | A1       | 41.4  | 135.9 | 863.6  | 0.90 | 3.81  |
|                  |               | A2       | 80.2  | 173.2 | 1223.3 | 0.87 | 5.34  |
|                  |               | A3       | 40.5  | 154.4 | 1362.1 | 0.91 | 4.04  |
|                  |               | A4       | 48.9  | 211.3 | 1753.4 | 0.77 | 7.47  |
|                  |               | A5       | 18.0  | 88.5  | 1259.2 | 0.20 | 5.49  |
|                  |               | A6       | 18.1  | 156.3 | 451.4  | 0.47 | 2.59  |
|                  |               | A0       | 48.7  | 141.7 | 457.8  | 0.38 | 2.17  |
